# Supplementary material for: Electrochemical Impedance Spectra of Dye-Sensitized Solar Cells: Fundamentals and Spreadsheet Calculation
Source: Hindawi journal article supplement (doi:10.1155/2014/851705), 2014-01-01
Supplement: f1 [file 851705.f1.xlsx]

## Sheet: About
	Electrochemical Impedance Spectra of Dye-sensitized Solar Cells: Fundamentals and Spread Sheet Calculation
	Subrata Sarker1, A. J. Saleh Ahammad2, Hyun Woo Seo1 and Dong Min Kim1,*
	1Department of Materials Science and Engineering, Hongik University, Sejong 339-701, South Korea
	2Department of Chemistry, Jagannath University, Dhaka 1100, Bangladesh
	Useful worksheet functions for calculating impedance are summarized in the table below:
	Description	Function
	Converts radians to degrees	=DEGREES(angle in radians)
	Returns the value of constant pi	=PI()
	Returns product of numbers	=PRODUCT(number1, number2, …)
	Raises a number to a power	=POWER(number, number)
	Complex number constructor	=COMPLEX(real_part, imaginary_part, suffix "I" or "j")
	Returns real part from the complex number	=IMREAL(complex_number)
	Returns imaginary part from the complex number	=IMAGINARY(complex_number)
	Returns amplitude of the complex number	=IMABS(complex_number)
	Returns phase angle of the complex number in radian	=IMARGUMENT(complex_number)
	Subtracts a complex number from another complex number	=IMSUB(complex _umber1, complex_number2)
	Returns sum of complex numbers	=IMSUM(complex _umber1, complex_number2, ….)
	Returns product of complex numbers	=IMPRODUCT(complex _umber1, complex_number2, ….)
	Divides a complex number by another complex number	=IMDIV(complex _umber1, complex_number2)
	Raises a complex number to an integer power	=IMPOWER(complex_number, number)
	Returns square root of a complex number	=IMSQRT(complex_number)
	Returns exponential of a complex number	=IMEXP(complex_number)
	Important: Don't change any cell containing formula.
	Notes:
	Cell references used in formulas are the combination of column letter and row number. For example "G13" without quotes refers to the cell with column letter "G" and row number "13".
	An absolute cell reference consists of the column letter and row number preceded by dollar signs ($). For example "$G$13" without quotes refers to the cell with column letter "G" and row number "13".

## Sheet: Impedance as Complex numbers
	Impedance as a complex number and its properties
	|Z|/Ω	q/degrees	q/radians	Z'/Ω	Z"/Ω	Z(w)
	100	50	0.872665	64.2788	76.6044	64.2787609686539+76.6044443118978j
	Z(w)	Z'/Ω	Z"/Ω	|Z|/Ω	q/radians	q/degrees
	64.2787609686539+76.6044443118978j	64.2788	76.6044	100	0.872665	50

## Sheet: Figure 1
	power	f = 10^power (Hz)	ω = 2πf (radian)	s = j*ω	Cdl (F)	ZCdl(ω) = 1/sCdl	Z' (Ω)	Z" (Ω)	|Z| (Ω)	ϴ (radian)	ϴ (degrees)
	-2	0.01	0.0628319	0.0628318530717959i	0.0001	-159154.943091895i	0	-159155	159155	-1.5708	-90
	5	100000	628319	628318.530717959i	0.0001	-0.0159154943091895i	0	-0.0159155	0.0159155	-1.5708	-90

## Sheet: Figure 2a&b
	Impedance corresponding to the equivalent circuit model with RS = 50 Ω and Cdl = 100 μF.
	Parameter	Value	Unit		power	f = 10^power	ω = 2πf	s = j*ω	ZRs(ω) = Rs	ZCdl(ω) = 1/sCdl	Z(ω) = ZRs +ZCdl	Z' / Ω	Z" / Ω	|Z|/ Ω	ϴ/radian	ϴ/degrees
	Rs	50	Ω		-2	0.01	0.0628319	0.0628318530717959j	50	-159154.943091895j	50-159154.943091895j	50	-159155	159155	-1.57048	-89.982
	Cdl	0.0001	F		-1.86667	0.0135936	0.0854109	0.0854108810238862j	50	-117081.101144518j	50-117081.101144518j	50	-117081	117081	-1.57037	-89.9755
					-1.73333	0.0184785	0.116104	0.116103826970385j	50	-86129.8052005705j	50-86129.8052005705j	50	-86129.8	86129.8	-1.57022	-89.9667
					-1.6	0.0251189	0.157826	0.157826479197647j	50	-63360.7240739175j	50-63360.7240739175j	50	-63360.7	63360.7	-1.57001	-89.9548
					-1.46667	0.0341455	0.214542	0.214542433147179j	50	-46610.8259019318j	50-46610.8259019318j	50	-46610.8	46610.9	-1.56972	-89.9385
					-1.33333	0.0464159	0.29164	0.291639627613246j	50	-34288.893048723j	50-34288.893048723j	50	-34288.9	34288.9	-1.56934	-89.9165
					-1.2	0.0630957	0.396442	0.3964421916295j	50	-25224.3585852881j	50-25224.3585852881j	50	-25224.4	25224.4	-1.56881	-89.8864
					-1.06667	0.0857696	0.538906	0.538906226805449j	50	-18556.1040169798j	50-18556.1040169798j	50	-18556.1	18556.2	-1.5681	-89.8456
					-0.933333	0.116591	0.732566	0.73256562349222j	50	-13650.6541930386j	50-13650.6541930386j	50	-13650.7	13650.7	-1.56713	-89.7901
					-0.8	0.158489	0.995818	0.995817762032061j	50	-10041.9980254159j	50-10041.9980254159j	50	-10042	10042.1	-1.56582	-89.7147
					-0.666667	0.215443	1.35367	1.35367123896863j	50	-7387.31806669621j	50-7387.31806669621j	50	-7387.32	7387.49	-1.56403	-89.6122
					-0.533333	0.292864	1.84012	1.84012164984046j	50	-5434.42331699483j	50-5434.42331699483j	50	-5434.42	5434.65	-1.5616	-89.4729
					-0.4	0.398107	2.50138	2.50138112470457j	50	-3997.79142060212j	50-3997.79142060212j	50	-3997.79	3998.1	-1.55829	-89.2834
					-0.266667	0.54117	3.40027	3.40026841789007j	50	-2940.94429351115j	50-2940.94429351115j	50	-2940.94	2941.37	-1.5538	-89.026
					-0.133333	0.735642	4.62218	4.62217660456128j	50	-2163.48289031876j	50-2163.48289031876j	50	-2163.48	2164.06	-1.54769	-88.6761
					-3.88578e-16	1	6.28319	6.28318530717958j	50	-1591.54943091896j	50-1591.54943091896j	50	-1591.55	1592.33	-1.53939	-88.2006
					0.133333	1.35936	8.54109	8.54108810238862j	50	-1170.81101144518j	50-1170.81101144518j	50	-1170.81	1171.88	-1.52812	-87.5546
	Frequency (f)	Value	Unit		0.266667	1.84785	11.6104	11.6103826970385j	50	-861.298052005705j	50-861.298052005705j	50	-861.298	862.748	-1.51281	-86.6776
	Low	0.01	Hz		0.4	2.51189	15.7826	15.7826479197647j	50	-633.607240739175j	50-633.607240739175j	50	-633.607	635.577	-1.49205	-85.488
	High	1000000	Hz		0.533333	3.41455	21.4542	21.4542433147179j	50	-466.108259019318j	50-466.108259019318j	50	-466.108	468.782	-1.46393	-83.8772
					0.666667	4.64159	29.164	29.1639627613246j	50	-342.88893048723j	50-342.88893048723j	50	-342.889	346.515	-1.426	-81.7036
					0.8	6.30957	39.6442	39.64421916295j	50	-252.243585852881j	50-252.243585852881j	50	-252.244	257.151	-1.37511	-78.7881
					0.933333	8.57696	53.8906	53.8906226805449j	50	-185.561040169798j	50-185.561040169798j	50	-185.561	192.179	-1.30759	-74.9196
					1.06667	11.6591	73.2566	73.256562349222j	50	-136.506541930386j	50-136.506541930386j	50	-136.507	145.375	-1.21969	-69.8831
					1.2	15.8489	99.5818	99.5817762032061j	50	-100.419980254159j	50-100.419980254159j	50	-100.42	112.179	-1.10882	-63.5309
					1.33333	21.5443	135.367	135.367123896863j	50	-73.8731806669621j	50-73.8731806669621j	50	-73.8732	89.2034	-0.975787	-55.9085
					1.46667	29.2864	184.012	184.012164984046j	50	-54.3442331699483j	50-54.3442331699483j	50	-54.3442	73.8464	-0.827008	-47.3841
					1.6	39.8107	250.138	250.138112470457j	50	-39.9779142060212j	50-39.9779142060212j	50	-39.9779	64.0174	-0.674472	-38.6444
					1.73333	54.117	340.027	340.026841789007j	50	-29.4094429351115j	50-29.4094429351115j	50	-29.4094	58.0079	-0.53169	-30.4636
					1.86667	73.5642	462.218	462.217660456128j	50	-21.6348289031876j	50-21.6348289031876j	50	-21.6348	54.48	-0.408372	-23.398
					2	100	628.319	628.318530717958j	50	-15.9154943091896j	50-15.9154943091896j	50	-15.9155	52.4719	-0.308169	-17.6568
					2.13333	135.936	854.109	854.108810238862j	50	-11.7081101144518j	50-11.7081101144518j	50	-11.7081	51.3525	-0.230018	-13.1791
					2.26667	184.785	1161.04	1161.03826970385j	50	-8.61298052005705j	50-8.61298052005705j	50	-8.61298	50.7364	-0.170585	-9.77383
					2.4	251.189	1578.26	1578.26479197647j	50	-6.33607240739175j	50-6.33607240739175j	50	-6.33607	50.3999	-0.12605	-7.22211
					2.53333	341.455	2145.42	2145.42433147179j	50	-4.66108259019318j	50-4.66108259019318j	50	-4.66108	50.2168	-0.092953	-5.32582
					2.66667	464.159	2916.4	2916.39627613246j	50	-3.4288893048723j	50-3.4288893048723j	50	-3.42889	50.1174	-0.0684706	-3.92308
					2.8	630.957	3964.42	3964.421916295j	50	-2.52243585852881j	50-2.52243585852881j	50	-2.52244	50.0636	-0.050406	-2.88805
					2.93333	857.696	5389.06	5389.06226805449j	50	-1.85561040169798j	50-1.85561040169798j	50	-1.85561	50.0344	-0.0370952	-2.1254
					3.06667	1165.91	7325.66	7325.6562349222j	50	-1.36506541930386j	50-1.36506541930386j	50	-1.36507	50.0186	-0.0272945	-1.56386
					3.2	1584.89	9958.18	9958.1776203206j	50	-1.00419980254159j	50-1.00419980254159j	50	-1.0042	50.0101	-0.0200813	-1.15057
					3.33333	2154.43	13536.7	13536.7123896863j	50	-0.738731806669621j	50-0.738731806669621j	50	-0.738732	50.0055	-0.0147736	-0.846463
					3.46667	2928.64	18401.2	18401.2164984046j	50	-0.543442331699483j	50-0.543442331699483j	50	-0.543442	50.003	-0.0108684	-0.622715
					3.6	3981.07	25013.8	25013.8112470457j	50	-0.399779142060212j	50-0.399779142060212j	50	-0.399779	50.0016	-0.00799541	-0.458103
					3.73333	5411.7	34002.7	34002.6841789007j	50	-0.294094429351115j	50-0.294094429351115j	50	-0.294094	50.0009	-0.00588182	-0.337004
					3.86667	7356.42	46221.8	46221.7660456128j	50	-0.216348289031876j	50-0.216348289031876j	50	-0.216348	50.0005	-0.00432694	-0.247915
					4	10000	62831.9	62831.8530717958j	50	-0.159154943091896j	50-0.159154943091896j	50	-0.159155	50.0003	-0.00318309	-0.182378
					4.13333	13593.6	85410.9	85410.8810238862j	50	-0.117081101144518j	50-0.117081101144518j	50	-0.117081	50.0001	-0.00234162	-0.134165
					4.26667	18478.5	116104	116103.826970385j	50	-0.0861298052005705j	50-0.0861298052005705j	50	-0.0861298	50.0001	-0.00172259	-0.0986974
					4.4	25118.9	157826	157826.479197648j	50	-0.0633607240739171j	50-0.0633607240739171j	50	-0.0633607	50	-0.00126721	-0.072606
					4.53333	34145.5	214542	214542.43314718j	50	-0.0466108259019316j	50-0.0466108259019316j	50	-0.0466108	50	-0.000932216	-0.0534121
					4.66667	46415.9	291640	291639.627613248j	50	-0.0342888930487228j	50-0.0342888930487228j	50	-0.0342889	50	-0.000685778	-0.0392922
					4.8	63095.7	396442	396442.191629501j	50	-0.025224358585288j	50-0.025224358585288j	50	-0.0252244	50	-0.000504487	-0.028905
					4.93333	85769.6	538906	538906.226805452j	50	-0.0185561040169797j	50-0.0185561040169797j	50	-0.0185561	50	-0.000371122	-0.0212637
					5.06667	116591	732566	732565.623492225j	50	-0.0136506541930385j	50-0.0136506541930385j	50	-0.0136507	50	-0.000273013	-0.0156425
					5.2	158489	995818	995817.762032069j	50	-0.0100419980254158j	50-0.0100419980254158j	50	-0.010042	50	-0.00020084	-0.0115073
					5.33333	215443	1.35367e+06	1353671.23896864j	50	-0.00738731806669615j	50-0.00738731806669615j	50	-0.00738732	50	-0.000147746	-0.00846524
					5.46667	292864	1.84012e+06	1840121.64984048j	50	-0.00543442331699477j	50-0.00543442331699477j	50	-0.00543442	50	-0.000108688	-0.00622739
					5.6	398107	2.50138e+06	2501381.1247046j	50	-0.00399779142060207j	50-0.00399779142060207j	50	-0.00399779	50	-7.99558e-05	-0.00458113
					5.73333	541170	3.40027e+06	3400268.41789011j	50	-0.00294094429351112j	50-0.00294094429351112j	50	-0.00294094	50	-5.88189e-05	-0.00337007
					5.86667	735642	4.62218e+06	4622176.60456134j	50	-0.00216348289031873j	50-0.00216348289031873j	50	-0.00216348	50	-4.32697e-05	-0.00247917
					6	1e+06	6.28319e+06	6283185.30717967j	50	-0.00159154943091893j	50-0.00159154943091893j	50	-0.00159155	50	-3.1831e-05	-0.00182378

## Sheet: Figure 2c&d, 3 & 4
	Impedance corresponding to the simplified Randle's circuit with RS = 50 Ω, Rct = 100 Ω and Cdl = 100 μF.
	Parameter	Value	Unit		power	f = 10^power	ω = 2πf	s = j*ω	ZRs(ω) = Rs	ZRct(ω) = Rct	ZCdl(ω) = 1/sCdl	Z(ω) = ZRs+1/(1/ZRct+1/ZCdl)	Z' / Ω	Z" / Ω	|Z|/ Ω	ϴ/degrees
	Rs	50	Ω		-2	0.01	0.0628319	0.0628318530717959j	50	100	-159154.943091895j	149.999960521598-0.0628318282667844j	150	-0.0628318	150	-0.024
	Rct	100	Ω		-1.86667	0.0135936	0.0854109	0.0854108810238862j	50	100	-117081.101144518j	149.999927049867-0.085410818716535j	150	-0.0854108	150	-0.0326245
	Cdl	0.0001	F		-1.73333	0.0184785	0.116104	0.116103826970385j	50	100	-86129.8052005705j	149.999865199195-0.116103670461492j	150	-0.116104	150	-0.0443484
					-1.6	0.0251189	0.157826	0.157826479197647j	50	100	-63360.7240739175j	149.999750908645-0.157826086065532j	150	-0.157826	150	-0.0602852
					-1.46667	0.0341455	0.214542	0.214542433147179j	50	100	-46610.8259019318j	149.999539717562-0.214541445646038j	150	-0.214541	150	-0.081949
					-1.33333	0.0464159	0.29164	0.291639627613246j	50	100	-34288.893048723j	149.99914947051-0.291637147132209j	149.999	-0.291637	149.999	-0.111398
					-1.2	0.0630957	0.396442	0.3964421916295j	50	100	-25224.3585852881j	149.998428360588-0.39643596098777j	149.998	-0.396436	149.999	-0.151429
					-1.06667	0.0857696	0.538906	0.538906226805449j	50	100	-18556.1040169798j	149.997095885128-0.538890576349571j	149.997	-0.538891	149.998	-0.205844
					-0.933333	0.116591	0.732566	0.73256562349222j	50	100	-13650.6541930386j	149.994633764053-0.732526312292397j	149.995	-0.732526	149.996	-0.279812
					-0.8	0.158489	0.995818	0.995817762032061j	50	100	-10041.9980254159j	149.990084453126-0.995719021255087j	149.99	-0.995719	149.993	-0.380356
					-0.666667	0.215443	1.35367	1.35367123896863j	50	100	-7387.31806669621j	149.981679098937-1.35342323420022j	149.982	-1.35342	149.988	-0.517019
					-0.533333	0.292864	1.84012	1.84012164984046j	50	100	-5434.42331699483j	149.966150984576-1.83949878677938j	149.966	-1.8395	149.977	-0.70276
					-0.4	0.398107	2.50138	2.50138112470457j	50	100	-3997.79142060212j	149.937470049102-2.49981701231552j	149.937	-2.49982	149.958	-0.955169
					-0.266667	0.54117	3.40027	3.40026841789007j	50	100	-2940.94429351115j	149.884515268292-3.39634162703033j	149.885	-3.39634	149.923	-1.29808
					-0.133333	0.735642	4.62218	4.62217660456128j	50	100	-2163.48289031876j	149.786810303842-4.61232260030213j	149.787	-4.61232	149.858	-1.76373
					-3.88578e-16	1	6.28319	6.28318530717958j	50	100	-1591.54943091896j	149.606768240717-6.25847782705714j	149.607	-6.25848	149.738	-2.39545
					0.133333	1.35936	8.54109	8.54108810238862j	50	100	-1170.81101144518j	149.275781328946-8.47923194763996j	149.276	-8.47923	149.516	-3.25105
	Frequency (f)	Value	Unit		0.266667	1.84785	11.6104	11.6103826970385j	50	100	-861.298052005705j	148.669919749258-11.4559552897497j	148.67	-11.456	149.111	-4.40629
	Low	0.01	Hz		0.4	2.51189	15.7826	15.7826479197647j	50	100	-633.607240739175j	147.569619084714-15.3990694567959j	147.57	-15.3991	148.371	-5.95732
	High	1000000	Hz		0.533333	3.41455	21.4542	21.4542433147179j	50	100	-466.108259019318j	145.599693739364-20.5101909029683j	145.6	-20.5102	147.037	-8.01832
					0.666667	4.64159	29.164	29.1639627613246j	50	100	-342.88893048723j	142.161339613117-26.8778987651075j	142.161	-26.8779	144.68	-10.7063
					0.8	6.30957	39.6442	39.64421916295j	50	100	-252.243585852881j	136.417994009445-34.2597389413293j	136.418	-34.2597	140.654	-14.0976
					0.933333	8.57696	53.8906	53.8906226805449j	50	100	-185.561040169798j	127.494153918561-41.7620820877322j	127.494	-41.7621	134.16	-18.1368
					1.06667	11.6591	73.2566	73.256562349222j	50	100	-136.506541930386j	115.076526398287-47.6728261356692j	115.077	-47.6728	124.56	-22.5028
					1.2	15.8489	99.5818	99.5817762032061j	50	100	-100.419980254159j	100.209549172417-49.9995608895152j	100.21	-49.9996	111.991	-26.5169
					1.33333	21.5443	135.367	135.367123896863j	50	100	-73.8731806669621j	85.3054258934269-47.7919396114704j	85.3054	-47.7919	97.7808	-29.2595
					1.46667	29.2864	184.012	184.012164984046j	50	100	-54.3442331699483j	72.7995697161183-41.9539818416761j	72.7996	-41.954	84.0233	-29.9546
					1.6	39.8107	250.138	250.138112470457j	50	100	-39.9779142060212j	63.7799743998984-34.4689678628181j	63.78	-34.469	72.4982	-28.3884
					1.73333	54.117	340.027	340.026841789007j	50	100	-29.4094429351115j	57.9606265413462-27.068267015157j	57.9606	-27.0683	63.9697	-25.0331
					1.86667	73.5642	462.218	462.217660456128j	50	100	-21.6348289031876j	54.471368728894-20.6674559290608j	54.4714	-20.6675	58.2604	-20.7777
					2	100	628.319	628.318530717958j	50	100	-15.9154943091896j	52.4704523031858-15.5223096134648j	52.4705	-15.5223	54.7183	-16.4798
					2.13333	135.936	854.109	854.108810238862j	50	100	-11.7081101144518j	51.3522616432206-11.549785832228j	51.3523	-11.5498	52.6351	-12.6756
					2.26667	184.785	1161.04	1161.03826970385j	50	100	-8.61298052005705j	50.7363716764641-8.54955697100798j	50.7364	-8.54956	51.4517	-9.56502
					2.4	251.189	1578.26	1578.26479197647j	50	100	-6.33607240739175j	50.3998528935459-6.31073743853364j	50.3999	-6.31074	50.7934	-7.13706
					2.53333	341.455	2145.42	2145.42433147179j	50	100	-4.66108259019318j	50.2167859267222-4.65097801910474j	50.2168	-4.65098	50.4317	-5.29152
					2.66667	464.159	2916.4	2916.39627613246j	50	100	-3.4288893048723j	50.1174347473082-3.42486259738165j	50.1174	-3.42486	50.2343	-3.90933
					2.8	630.957	3964.42	3964.421916295j	50	100	-2.52243585852881j	50.0635863686154-2.52083193316572j	50.0636	-2.52083	50.127	-2.88256
					2.93333	857.696	5389.06	5389.06226805449j	50	100	-1.85561040169798j	50.0344210474642-1.85497168116086j	50.0344	-1.85497	50.0688	-2.12321
					3.06667	1165.91	7325.66	7325.6562349222j	50	100	-1.36506541930386j	50.0186305643637-1.36481109991231j	50.0186	-1.36481	50.0372	-1.56299
					3.2	1584.89	9958.18	9958.1776203206j	50	100	-1.00419980254159j	50.0100831556314-1.00409854751265j	50.0101	-1.0041	50.0202	-1.15023
					3.33333	2154.43	13536.7	13536.7123896863j	50	100	-0.738731806669621j	50.0054569490227-0.738691494451516j	50.0055	-0.738691	50.0109	-0.846324
					3.46667	2928.64	18401.2	18401.2164984046j	50	100	-0.543442331699483j	50.0029532084619-0.543426282714558j	50.003	-0.543426	50.0059	-0.622659
					3.6	3981.07	25013.8	25013.8112470457j	50	100	-0.399779142060212j	50.0015982080812-0.399772752757656j	50.0016	-0.399773	50.0032	-0.458081
					3.73333	5411.7	34002.7	34002.6841789007j	50	100	-0.294094429351115j	50.000864907853-0.294091885705301j	50.0009	-0.294092	50.0017	-0.336995
					3.86667	7356.42	46221.8	46221.7660456128j	50	100	-0.216348289031876j	50.0004680636308-0.216347276384219j	50.0005	-0.216347	50.0009	-0.247912
					4	10000	62831.9	62831.8530717958j	50	100	-0.159154943091896j	50.0002533023175-0.159154539948737j	50.0003	-0.159155	50.0005	-0.182376
					4.13333	13593.6	85410.9	85410.8810238862j	50	100	-0.117081101144518j	50.0001370796545-0.117080940650149j	50.0001	-0.117081	50.0003	-0.134164
					4.26667	18478.5	116104	116103.826970385j	50	100	-0.0861298052005705j	50.0000741833784-0.0861297413065712j	50.0001	-0.0861297	50.0001	-0.0986972
					4.4	25118.9	157826	157826.479197648j	50	100	-0.0633607240739171j	50.0000401457974-0.0633606986372492j	50	-0.0633607	50.0001	-0.0726059
					4.53333	34145.5	214542	214542.43314718j	50	100	-0.0466108259019316j	50.0000217256862-0.0466108157754098j	50	-0.0466108	50	-0.053412
					4.66667	46415.9	291640	291639.627613248j	50	100	-0.0342888930487228j	50.0000117572805-0.0342888890172815j	50	-0.0342889	50	-0.0392922
					4.8	63095.7	396442	396442.191629501j	50	100	-0.025224358585288j	50.0000063626823-0.0252243569803422j	50	-0.0252244	50	-0.028905
					4.93333	85769.6	538906	538906.226805452j	50	100	-0.0185561040169797j	50.0000034432898-0.0185561033780393j	50	-0.0185561	50	-0.0212637
					5.06667	116591	732566	732565.623492225j	50	100	-0.0136506541930385j	50.0000018634036-0.0136506539386717j	50	-0.0136507	50	-0.0156425
					5.2	158489	995818	995817.762032069j	50	100	-0.0100419980254158j	50.0000010084172-0.0100419979241506j	50	-0.010042	50	-0.0115073
					5.33333	215443	1.35367e+06	1353671.23896864j	50	100	-0.00738731806669615j	50.0000005457247-0.00738731802638173j	50	-0.00738732	50	-0.00846524
					5.46667	292864	1.84012e+06	1840121.64984048j	50	100	-0.00543442331699477j	50.0000002953296-0.00543442330094532j	50	-0.00543442	50	-0.00622739
					5.6	398107	2.50138e+06	2501381.1247046j	50	100	-0.00399779142060207j	50.0000001598234-0.00399779141421266j	50	-0.00399779	50	-0.00458113
					5.73333	541170	3.40027e+06	3400268.41789011j	50	100	-0.00294094429351112j	50.0000000864915-0.00294094429096745j	50	-0.00294094	50	-0.00337007
					5.86667	735642	4.62218e+06	4622176.60456134j	50	100	-0.00216348289031873j	50.0000000468066-0.00216348288930608j	50	-0.00216348	50	-0.00247917
					6	1e+06	6.28319e+06	6283185.30717967j	50	100	-0.00159154943091893j	50.0000000253303-0.00159154943051579j	50	-0.00159155	50	-0.00182378

## Sheet: Figure 5a
	Impedance corresponding to the simplified Randle's circuit with RS = 10 Ω, Rct = 100 Ω, Cdl = 100 μF and L1 = 10 μH
	Parameter	Value	Unit		power	f = 10^power	ω = 2πf	s = j*ω	ZRs(ω) = Rs	ZR1(ω) = Rct	ZCdl(ω) = 1/sCdl	ZL1(ω) = sL	ZRsL1(ω) =ZRs+ZL1	Z(ω) = ZRsL1+1/(1/ZRct+1/ZCdl)	Z' / Ω	Z" / Ω	|Z|/ Ω	ϴ/degrees
	Rs	10	Ω		-2	0.01	0.0628319	0.0628318530717959j	10	100	-159154.943091895j	6.28318530717959E-07j	10+6.28318530717959E-07j	109.999960521598-0.0628311999482537j	110	-0.0628312	110	-0.0327269
	Rct	100	Ω		-1.86667	0.0135936	0.0854109	0.0854108810238862j	10	100	-117081.101144518j	8.54108810238862E-07j	10+8.54108810238862E-07j	109.999927049867-0.0854099646077248j	110	-0.08541	110	-0.0444876
	Cdl	0.0001	F		-1.73333	0.0184785	0.116104	0.116103826970385j	10	100	-86129.8052005705j	1.16103826970385E-06j	10+1.16103826970385E-06j	109.999865199195-0.116102509423222j	110	-0.116103	110	-0.0604744
	L1	1e-05	H		-1.6	0.0251189	0.157826	0.157826479197647j	10	100	-63360.7240739175j	1.57826479197647E-06j	10+1.57826479197647E-06j	109.999750908645-0.15782450780074j	110	-0.157825	110	-0.0822063
					-1.46667	0.0341455	0.214542	0.214542433147179j	10	100	-46610.8259019318j	2.14542433147179E-06j	10+2.14542433147179E-06j	109.999539717562-0.214539300221707j	110	-0.214539	110	-0.111748
					-1.33333	0.0464159	0.29164	0.291639627613246j	10	100	-34288.893048723j	2.91639627613246E-06j	10+2.91639627613246E-06j	109.99914947051-0.291634230735933j	109.999	-0.291634	110	-0.151905
					-1.2	0.0630957	0.396442	0.3964421916295j	10	100	-25224.3585852881j	0.000003964421916295j	10+0.000003964421916295j	109.998428360588-0.396431996565854j	109.998	-0.396432	109.999	-0.206492
					-1.06667	0.0857696	0.538906	0.538906226805449j	10	100	-18556.1040169798j	5.38906226805449E-06j	10+5.38906226805449E-06j	109.997095885128-0.538885187287303j	109.997	-0.538885	109.998	-0.280695
					-0.933333	0.116591	0.732566	0.73256562349222j	10	100	-13650.6541930386j	0.0000073256562349222j	10+0.0000073256562349222j	109.994633764053-0.732518986636162j	109.995	-0.732519	109.997	-0.381561
					-0.8	0.158489	0.995818	0.995817762032061j	10	100	-10041.9980254159j	9.95817762032061E-06j	10+9.95817762032061E-06j	109.990084453126-0.995709063077467j	109.99	-0.995709	109.995	-0.518668
					-0.666667	0.215443	1.35367	1.35367123896863j	10	100	-7387.31806669621j	0.0000135367123896863j	10+0.0000135367123896863j	109.981679098937-1.35340969748783j	109.982	-1.35341	109.99	-0.705033
					-0.533333	0.292864	1.84012	1.84012164984046j	10	100	-5434.42331699483j	0.0000184012164984046j	10+0.0000184012164984046j	109.966150984576-1.83948038556288j	109.966	-1.83948	109.982	-0.958337
					-0.4	0.398107	2.50138	2.50138112470457j	10	100	-3997.79142060212j	0.0000250138112470457j	10+0.0000250138112470457j	109.937470049102-2.49979199850427j	109.937	-2.49979	109.966	-1.30258
					-0.266667	0.54117	3.40027	3.40026841789007j	10	100	-2940.94429351115j	0.0000340026841789007j	10+0.0000340026841789007j	109.884515268292-3.39630762434615j	109.885	-3.39631	109.937	-1.77033
					-0.133333	0.735642	4.62218	4.62217660456128j	10	100	-2163.48289031876j	0.0000462217660456128j	10+0.0000462217660456128j	109.786810303842-4.61227637853608j	109.787	-4.61228	109.884	-2.40565
					-3.88578e-16	1	6.28319	6.28318530717958j	10	100	-1591.54943091896j	0.0000628318530717958j	10+0.0000628318530717958j	109.606768240717-6.25841499520407j	109.607	-6.25841	109.785	-3.26797
					0.133333	1.35936	8.54109	8.54108810238862j	10	100	-1170.81101144518j	0.0000854108810238862j	10+0.0000854108810238862j	109.275781328946-8.47914653675894j	109.276	-8.47915	109.604	-4.43692
	Frequency (f)	Value	Unit		0.266667	1.84785	11.6104	11.6103826970385j	10	100	-861.298052005705j	0.000116103826970385j	10+0.000116103826970385j	108.669919749258-11.4558391859227j	108.67	-11.4558	109.272	-6.01782
	Low	0.01	Hz		0.4	2.51189	15.7826	15.7826479197647j	10	100	-633.607240739175j	0.000157826479197647j	10+0.000157826479197647j	107.569619084714-15.3989116303167j	107.57	-15.3989	108.666	-8.14671
	High	1000000	Hz		0.533333	3.41455	21.4542	21.4542433147179j	10	100	-466.108259019318j	0.000214542433147179j	10+0.000214542433147179j	105.599693739364-20.5099763605352j	105.6	-20.51	107.573	-10.9914
					0.666667	4.64159	29.164	29.1639627613246j	10	100	-342.88893048723j	0.000291639627613246j	10+0.000291639627613246j	102.161339613118-26.8776071254799j	102.161	-26.8776	105.638	-14.7399
					0.8	6.30957	39.6442	39.64421916295j	10	100	-252.243585852881j	0.0003964421916295j	10+0.0003964421916295j	96.4179940094449-34.2593424991377j	96.418	-34.2593	102.324	-19.5612
					0.933333	8.57696	53.8906	53.8906226805449j	10	100	-185.561040169798j	0.000538906226805449j	10+0.000538906226805449j	87.4941539185608-41.7615431815054j	87.4942	-41.7615	96.9497	-25.5155
					1.06667	11.6591	73.2566	73.256562349222j	10	100	-136.506541930386j	0.00073256562349222j	10+0.00073256562349222j	75.0765263982873-47.6720935700457j	75.0765	-47.6721	88.9332	-32.4147
					1.2	15.8489	99.5818	99.5817762032061j	10	100	-100.419980254159j	0.000995817762032061j	10+0.000995817762032061j	60.2095491724174-49.9985650717532j	60.2095	-49.9986	78.2627	-39.7066
					1.33333	21.5443	135.367	135.367123896863j	10	100	-73.8731806669621j	0.00135367123896863j	10+0.00135367123896863j	45.3054258934269-47.7905859402314j	45.3054	-47.7906	65.8523	-46.5291
					1.46667	29.2864	184.012	184.012164984046j	10	100	-54.3442331699483j	0.00184012164984046j	10+0.00184012164984046j	32.7995697161183-41.9521417200263j	32.7996	-41.9521	53.2522	-51.9805
					1.6	39.8107	250.138	250.138112470457j	10	100	-39.9779142060212j	0.00250138112470457j	10+0.00250138112470457j	23.7799743998984-34.4664664816934j	23.78	-34.4665	41.8739	-55.3965
					1.73333	54.117	340.027	340.026841789007j	10	100	-29.4094429351115j	0.00340026841789007j	10+0.00340026841789007j	17.9606265413462-27.0648667467391j	17.9606	-27.0649	32.4822	-56.4312
					1.86667	73.5642	462.218	462.217660456128j	10	100	-21.6348289031876j	0.00462217660456128j	10+0.00462217660456128j	14.471368728894-20.6628337524562j	14.4714	-20.6628	25.2264	-54.9942
					2	100	628.319	628.318530717958j	10	100	-15.9154943091896j	0.00628318530717958j	10+0.00628318530717958j	12.4704523031858-15.5160264281576j	12.4705	-15.516	19.9063	-51.2107
					2.13333	135.936	854.109	854.108810238862j	10	100	-11.7081101144518j	0.00854108810238862j	10+0.00854108810238862j	11.3522616432206-11.5412447441256j	11.3523	-11.5412	16.1887	-45.473
					2.26667	184.785	1161.04	1161.03826970385j	10	100	-8.61298052005705j	0.0116103826970385j	10+0.0116103826970385j	10.7363716764641-8.53794658831094j	10.7364	-8.53795	13.7174	-38.493
					2.4	251.189	1578.26	1578.26479197647j	10	100	-6.33607240739175j	0.0157826479197647j	10+0.0157826479197647j	10.3998528935459-6.29495479061388j	10.3999	-6.29495	12.1566	-31.1862
					2.53333	341.455	2145.42	2145.42433147179j	10	100	-4.66108259019318j	0.0214542433147179j	10+0.0214542433147179j	10.2167859267222-4.62952377579002j	10.2168	-4.62952	11.2167	-24.3767
					2.66667	464.159	2916.4	2916.39627613246j	10	100	-3.4288893048723j	0.0291639627613246j	10+0.0291639627613246j	10.1174347473082-3.39569863462033j	10.1174	-3.3957	10.6721	-18.5532
					2.8	630.957	3964.42	3964.421916295j	10	100	-2.52243585852881j	0.03964421916295j	10+0.03964421916295j	10.0635863686154-2.48118771400277j	10.0636	-2.48119	10.3649	-13.8501
					2.93333	857.696	5389.06	5389.06226805449j	10	100	-1.85561040169798j	0.0538906226805449j	10+0.0538906226805449j	10.0344210474642-1.80108105848032j	10.0344	-1.80108	10.1948	-10.1757
					3.06667	1165.91	7325.66	7325.6562349222j	10	100	-1.36506541930386j	0.073256562349222j	10+0.073256562349222j	10.0186305643637-1.29155453756309j	10.0186	-1.29155	10.1015	-7.34579
					3.2	1584.89	9958.18	9958.1776203206j	10	100	-1.00419980254159j	0.099581776203206j	10+0.099581776203206j	10.0100831556314-0.904516771309444j	10.0101	-0.904517	10.0509	-5.16326
					3.33333	2154.43	13536.7	13536.7123896863j	10	100	-0.738731806669621j	0.135367123896863j	10+0.135367123896863j	10.0054569490227-0.603324370554653j	10.0055	-0.603324	10.0236	-3.45073
					3.46667	2928.64	18401.2	18401.2164984046j	10	100	-0.543442331699483j	0.184012164984046j	10+0.184012164984046j	10.0029532084619-0.359414117730512j	10.003	-0.359414	10.0094	-2.0578
					3.6	3981.07	25013.8	25013.8112470457j	10	100	-0.399779142060212j	0.250138112470457j	10+0.250138112470457j	10.0015982080812-0.149634640287199j	10.0016	-0.149635	10.0027	-0.857142
					3.73333	5411.7	34002.7	34002.6841789007j	10	100	-0.294094429351115j	0.340026841789007j	10+0.340026841789007j	10.000864907853+0.045934956083706j	10.0009	0.045935	10.001	0.263163
					3.86667	7356.42	46221.8	46221.7660456128j	10	100	-0.216348289031876j	0.462217660456128j	10+0.462217660456128j	10.0004680636308+0.245870384071909j	10.0005	0.24587	10.0035	1.40838
					4	10000	62831.9	62831.8530717958j	10	100	-0.159154943091896j	0.628318530717958j	10+0.628318530717958j	10.0002533023175+0.469163990769221j	10.0003	0.469164	10.0113	2.68607
					4.13333	13593.6	85410.9	85410.8810238862j	10	100	-0.117081101144518j	0.854108810238862j	10+0.854108810238862j	10.0001370796545+0.737027869588713j	10.0001	0.737028	10.0273	4.21518
					4.26667	18478.5	116104	116103.826970385j	10	100	-0.0861298052005705j	1.16103826970385j	10+1.16103826970385j	10.0000741833784+1.07490852839728j	10.0001	1.07491	10.0577	6.13517
					4.4	25118.9	157826	157826.479197648j	10	100	-0.0633607240739171j	1.57826479197648j	10+1.57826479197648j	10.0000401457974+1.51490409333923j	10	1.5149	10.1141	8.61423
					4.53333	34145.5	214542	214542.43314718j	10	100	-0.0466108259019316j	2.1454243314718j	10+2.1454243314718j	10.0000217256862+2.09881351569639j	10	2.09881	10.2179	11.8532
					4.66667	46415.9	291640	291639.627613248j	10	100	-0.0342888930487228j	2.91639627613248j	10+2.91639627613248j	10.0000117572805+2.8821073871152j	10	2.88211	10.4071	16.0775
					4.8	63095.7	396442	396442.191629501j	10	100	-0.025224358585288j	3.96442191629501j	10+3.96442191629501j	10.0000063626823+3.93919755931467j	10	3.9392	10.7479	21.5004
					4.93333	85769.6	538906	538906.226805452j	10	100	-0.0185561040169797j	5.38906226805452j	10+5.38906226805452j	10.0000034432898+5.37050616467648j	10	5.37051	11.3509	28.238
					5.06667	116591	732566	732565.623492225j	10	100	-0.0136506541930385j	7.32565623492225j	10+7.32565623492225j	10.0000018634036+7.31200558098358j	10	7.31201	12.3881	36.1743
					5.2	158489	995818	995817.762032069j	10	100	-0.0100419980254158j	9.95817762032069j	10+9.95817762032069j	10.0000010084172+9.94813562239654j	10	9.94814	14.1055	44.851
					5.33333	215443	1.35367e+06	1353671.23896864j	10	100	-0.00738731806669615j	13.5367123896864j	10+13.5367123896864j	10.0000005457247+13.52932507166j	10	13.5293	16.8239	53.5306
					5.46667	292864	1.84012e+06	1840121.64984048j	10	100	-0.00543442331699477j	18.4012164984048j	10+18.4012164984048j	10.0000002953296+18.3957820751039j	10	18.3958	20.9381	61.4714
					5.6	398107	2.50138e+06	2501381.1247046j	10	100	-0.00399779142060207j	25.013811247046j	10+25.013811247046j	10.0000001598234+25.0098134556318j	10	25.0098	26.9349	68.2063
					5.73333	541170	3.40027e+06	3400268.41789011j	10	100	-0.00294094429351112j	34.0026841789011j	10+34.0026841789011j	10.0000000864915+33.9997432346101j	10	33.9997	35.4398	73.6103
					5.86667	735642	4.62218e+06	4622176.60456134j	10	100	-0.00216348289031873j	46.2217660456134j	10+46.2217660456134j	10.0000000468066+46.2196025627241j	10	46.2196	47.289	77.7917
					6	1e+06	6.28319e+06	6283185.30717967j	10	100	-0.00159154943091893j	62.8318530717967j	10+62.8318530717967j	10.0000000253303+62.8302615223662j	10	62.8303	63.6211	80.9567

## Sheet: Figure 5b
	Impedance corresponding to the simplified Randle's circuit with RS = 10 Ω, Rct = 100 Ω, R1 = 160 Ω, Cdl = 100 μF and L1 = 100H
	Parameter	Value	Unit		power	f = 10^power	ω = 2πf	s = j*ω	ZRs(ω) = Rs	ZRct(ω) = Rct	ZR1(ω) = R1	ZCdl(ω) = 1/sCdl	ZL1(ω) = sL1	ZR1L1(ω) =ZR1+ZL1	Z(ω) = ZRs+1/(1/ZRct+1/ZCdl+1/ZR1L1)	Z' / Ω	Z" / Ω	|Z|/ Ω	ϴ/degrees
	Rs	10	Ω		-2	0.01	0.0628319	0.0628318530717959j	10	100	160	-159154.943091895j	6.28318530717959j	160+6.28318530717959j	71.5616193848801+0.905116125267114j	71.5616	0.905116	71.5673	0.724642
	Rct	100	Ω		-1.86667	0.0135936	0.0854109	0.0854108810238862j	10	100	160	-117081.101144518j	8.54108810238862j	160+8.54108810238862j	71.5812329900038+1.22973658840793j	71.5812	1.22974	71.5918	0.984221
	R1	160	F		-1.73333	0.0184785	0.116104	0.116103826970385j	10	100	160	-86129.8052005705j	11.6103826970385j	160+11.6103826970385j	71.6174259331936+1.6700479072666j	71.6174	1.67005	71.6369	1.33584
	Cdl	0.0001	F		-1.6	0.0251189	0.157826	0.157826479197647j	10	100	160	-63360.7240739175j	15.7826479197647j	160+15.7826479197647j	71.6841346645582+2.2661755279613j	71.6841	2.26618	71.7199	1.81071
	L1	100	H		-1.46667	0.0341455	0.214542	0.214542433147179j	10	100	160	-46610.8259019318j	21.4542433147179j	160+21.4542433147179j	71.8068238145118+3.07050279677323j	71.8068	3.0705	71.8724	2.44851
					-1.33333	0.0464159	0.29164	0.291639627613246j	10	100	160	-34288.893048723j	29.1639627613246j	160+29.1639627613246j	72.0315796340613+4.14891188844433j	72.0316	4.14891	72.151	3.29651
					-1.2	0.0630957	0.396442	0.3964421916295j	10	100	160	-25224.3585852881j	39.64421916295j	160+39.64421916295j	72.4403432625297+5.57805218224019j	72.4403	5.57805	72.6548	4.4032
					-1.06667	0.0857696	0.538906	0.538906226805449j	10	100	160	-18556.1040169798j	53.8906226805449j	160+53.8906226805449j	73.1740673019301+7.43176515136343j	73.1741	7.43177	73.5505	5.79924
					-0.933333	0.116591	0.732566	0.73256562349222j	10	100	160	-13650.6541930386j	73.256562349222j	160+73.256562349222j	74.4605717984215+9.74296293817443j	74.4606	9.74296	75.0953	7.45465
					-0.8	0.158489	0.995818	0.995817762032061j	10	100	160	-10041.9980254159j	99.5817762032061j	160+99.5817762032061j	76.6262068600746+12.4214742136004j	76.6262	12.4215	77.6265	9.20782
					-0.666667	0.215443	1.35367	1.35367123896863j	10	100	160	-7387.31806669621j	135.367123896863j	160+135.367123896863j	80.0329371332095+15.1253410034969j	80.0329	15.1253	81.4497	10.702
					-0.533333	0.292864	1.84012	1.84012164984046j	10	100	160	-5434.42331699483j	184.012164984046j	160+184.012164984046j	84.8590584930749+17.1691344057842j	84.8591	17.1691	86.5785	11.438
					-0.4	0.398107	2.50138	2.50138112470457j	10	100	160	-3997.79142060212j	250.138112470457j	160+250.138112470457j	90.768213563693+17.6846249453924j	90.7682	17.6846	92.4749	11.025
					-0.266667	0.54117	3.40027	3.40026841789007j	10	100	160	-2940.94429351115j	340.026841789007j	160+340.026841789007j	96.8277354734364+16.126923088499j	96.8277	16.1269	98.1615	9.45597
					-0.133333	0.735642	4.62218	4.62217660456128j	10	100	160	-2163.48289031876j	462.217660456128j	160+462.217660456128j	101.985743084625+12.6722651583562j	101.986	12.6723	102.77	7.083
					-3.88578e-16	1	6.28319	6.28318530717958j	10	100	160	-1591.54943091896j	628.318530717958j	160+628.318530717958j	105.667212783189+7.98388419706069j	105.667	7.98388	105.968	4.32088
					0.133333	1.35936	8.54109	8.54108810238862j	10	100	160	-1170.81101144518j	854.108810238862j	160+854.108810238862j	107.853044545258+2.65436890376302j	107.853	2.65437	107.886	1.40982
	Frequency (f)	Value	Unit		0.266667	1.84785	11.6104	11.6103826970385j	10	100	160	-861.298052005705j	1161.03826970385j	160+1161.03826970385j	108.752371902614-3.08261662324288j	108.752	-3.08262	108.796	-1.62363
	Low	0.01	Hz		0.4	2.51189	15.7826	15.7826479197647j	10	100	160	-633.607240739175j	1578.26479197647j	160+1578.26479197647j	108.488515730481-9.30809250972839j	108.489	-9.30809	108.887	-4.90385
	High	1000000	Hz		0.533333	3.41455	21.4542	21.4542433147179j	10	100	160	-466.108259019318j	2145.42433147179j	160+2145.42433147179j	106.932370396262-16.2468349938605j	106.932	-16.2468	108.16	-8.6392
					0.666667	4.64159	29.164	29.1639627613246j	10	100	160	-342.88893048723j	2916.39627613246j	160+2916.39627613246j	103.629994700067-24.060256498084j	103.63	-24.0603	106.386	-13.071
					0.8	6.30957	39.6442	39.64421916295j	10	100	160	-252.243585852881j	3964.421916295j	160+3964.421916295j	97.8187058015267-32.5703683080927j	97.8187	-32.5704	103.099	-18.416
					0.933333	8.57696	53.8906	53.8906226805449j	10	100	160	-185.561040169798j	5389.06226805449j	160+5389.06226805449j	88.6668961647069-40.9130944377259j	88.6669	-40.9131	97.6509	-24.7698
					1.06667	11.6591	73.2566	73.256562349222j	10	100	160	-136.506541930386j	7325.6562349222j	160+7325.6562349222j	75.9199206275895-47.3771282673252j	75.9199	-47.3771	89.4898	-31.9658
					1.2	15.8489	99.5818	99.5817762032061j	10	100	160	-100.419980254159j	9958.17762032061j	160+9958.17762032061j	60.7160202528702-49.9866919447222j	60.716	-49.9867	78.6454	-39.4642
					1.33333	21.5443	135.367	135.367123896863j	10	100	160	-73.8731806669621j	13536.7123896863j	160+13536.7123896863j	45.5566648585448-47.8652240573894j	45.5567	-47.8652	66.0794	-46.4156
					1.46667	29.2864	184.012	184.012164984046j	10	100	160	-54.3442331699483j	18401.2164984046j	160+18401.2164984046j	32.9044336336143-42.0204957952204j	32.9044	-42.0205	53.3706	-51.937
					1.6	39.8107	250.138	250.138112470457j	10	100	160	-39.9779142060212j	25013.8112470457j	160+25013.8112470457j	23.8182805028378-34.5086632721845j	23.8183	-34.5087	41.9304	-55.3861
					1.73333	54.117	340.027	340.026841789007j	10	100	160	-29.4094429351115j	34002.6841789007j	160+34002.6841789007j	17.973408029744-27.0879038252506j	17.9734	-27.0879	32.5084	-56.4349
					1.86667	73.5642	462.218	462.217660456128j	10	100	160	-21.6348289031876j	46221.7660456128j	160+46221.7660456128j	14.4754004660926-20.6762541503876j	14.4754	-20.6763	25.2397	-55.0042
					2	100	628.319	628.318530717958j	10	100	160	-15.9154943091896j	62831.8530717958j	160+62831.8530717958j	12.471682892892-15.5260449323515j	12.4717	-15.526	19.9148	-51.226
					2.13333	135.936	854.109	854.108810238862j	10	100	160	-11.7081101144518j	85410.8810238862j	160+85410.8810238862j	11.3526303245246-11.5513257676321j	11.3526	-11.5513	16.1962	-45.497
					2.26667	184.785	1161.04	1161.03826970385j	10	100	160	-8.61298052005705j	116103.826970385j	160+116103.826970385j	10.736480998134-8.55018176049813j	10.7365	-8.55018	13.7251	-38.5327
					2.4	251.189	1578.26	1578.26479197647j	10	100	160	-6.33607240739175j	157826.479197647j	160+157826.479197647j	10.3998851267004-6.31098873945973j	10.3999	-6.31099	12.165	-31.2507
					2.53333	341.455	2145.42	2145.42433147179j	10	100	160	-4.66108259019318j	214542.433147179j	160+214542.433147179j	10.2167954012837-4.65107862181535j	10.2168	-4.65108	11.2257	-24.4769
					2.66667	464.159	2916.4	2916.39627613246j	10	100	160	-3.4288893048723j	291639.627613246j	160+291639.627613246j	10.1174375275799-3.42490276882679j	10.1174	-3.4249	10.6814	-18.7017
					2.8	630.957	3964.42	3964.421916295j	10	100	160	-2.52243585852881j	396442.1916295j	160+396442.1916295j	10.0635871837334-2.52084795179454j	10.0636	-2.52085	10.3745	-14.0628
					2.93333	857.696	5389.06	5389.06226805449j	10	100	160	-1.85561040169798j	538906.226805449j	160+538906.226805449j	10.0344212863221-1.85497806392018j	10.0344	-1.85498	10.2044	-10.4735
					3.06667	1165.91	7325.66	7325.6562349222j	10	100	160	-1.36506541930386j	732565.62349222j	160+732565.62349222j	10.0186306343388-1.36481364214805j	10.0186	-1.36481	10.1112	-7.75751
					3.2	1584.89	9958.18	9958.1776203206j	10	100	160	-1.00419980254159j	995817.76203206j	160+995817.76203206j	10.0100831761281-1.00409955985647j	10.0101	-1.0041	10.0603	-5.72811
					3.33333	2154.43	13536.7	13536.7123896863j	10	100	160	-0.738731806669621j	1353671.23896863j	160+1353671.23896863j	10.005456955026-0.738691897529214j	10.0055	-0.738692	10.0327	-4.22242
					3.46667	2928.64	18401.2	18401.2164984046j	10	100	160	-0.543442331699483j	1840121.64984046j	160+1840121.64984046j	10.0029532102201-0.543426443194824j	10.003	-0.543426	10.0177	-3.10963
					3.6	3981.07	25013.8	25013.8112470457j	10	100	160	-0.399779142060212j	2501381.12470457j	160+2501381.12470457j	10.0015982085961-0.399772816648617j	10.0016	-0.399773	10.0096	-2.28895
					3.73333	5411.7	34002.7	34002.6841789007j	10	100	160	-0.294094429351115j	3400268.41789007j	160+3400268.41789007j	10.0008649080038-0.294091911141314j	10.0009	-0.294092	10.0052	-1.68439
					3.86667	7356.42	46221.8	46221.7660456128j	10	100	160	-0.216348289031876j	4622176.60456128j	160+4622176.60456128j	10.000468063675-0.2163472865106j	10.0005	-0.216347	10.0028	-1.23933
					4	10000	62831.9	62831.8530717958j	10	100	160	-0.159154943091896j	6283185.30717958j	160+6283185.30717958j	10.0002533023304-0.159154543980148j	10.0003	-0.159155	10.0015	-0.911788
					4.13333	13593.6	85410.9	85410.8810238862j	10	100	160	-0.117081101144518j	8541088.10238862j	160+8541088.10238862j	10.0001370796583-0.117080942255088j	10.0001	-0.117081	10.0008	-0.670785
					4.26667	18478.5	116104	116103.826970385j	10	100	160	-0.0861298052005705j	11610382.6970385j	160+11610382.6970385j	10.0000741833795-0.0861297419455102j	10.0001	-0.0861297	10.0004	-0.493471
					4.4	25118.9	157826	157826.479197648j	10	100	160	-0.0633607240739171j	15782647.9197648j	160+15782647.9197648j	10.0000401457978-0.0633606988916156j	10	-0.0633607	10.0002	-0.363024
					4.53333	34145.5	214542	214542.43314718j	10	100	160	-0.0466108259019316j	21454243.314718j	160+21454243.314718j	10.0000217256863-0.0466108158766749j	10	-0.0466108	10.0001	-0.267058
					4.66667	46415.9	291640	291639.627613248j	10	100	160	-0.0342888930487228j	29163962.7613248j	160+29163962.7613248j	10.0000117572805-0.0342888890575959j	10	-0.0342889	10.0001	-0.19646
					4.8	63095.7	396442	396442.191629501j	10	100	160	-0.025224358585288j	39644219.1629501j	160+39644219.1629501j	10.0000063626823-0.0252243569963917j	10	-0.0252244	10	-0.144525
					4.93333	85769.6	538906	538906.226805452j	10	100	160	-0.0185561040169797j	53890622.6805452j	160+53890622.6805452j	10.0000034432898-0.0185561033844287j	10	-0.0185561	10	-0.106318
					5.06667	116591	732566	732565.623492225j	10	100	160	-0.0136506541930385j	73256562.3492225j	160+73256562.3492225j	10.0000018634036-0.0136506539412154j	10	-0.0136507	10	-0.0782124
					5.2	158489	995818	995817.762032069j	10	100	160	-0.0100419980254158j	99581776.2032069j	160+99581776.2032069j	10.0000010084172-0.0100419979251632j	10	-0.010042	10	-0.0575364
					5.33333	215443	1.35367e+06	1353671.23896864j	10	100	160	-0.00738731806669615j	135367123.896864j	160+135367123.896864j	10.0000005457247-0.00738731802678486j	10	-0.00738732	10	-0.0423262
					5.46667	292864	1.84012e+06	1840121.64984048j	10	100	160	-0.00543442331699477j	184012164.984048j	160+184012164.984048j	10.0000002953296-0.0054344233011058j	10	-0.00543442	10	-0.0311369
					5.6	398107	2.50138e+06	2501381.1247046j	10	100	160	-0.00399779142060207j	250138112.47046j	160+250138112.47046j	10.0000001598234-0.00399779141427656j	10	-0.00399779	10	-0.0229057
					5.73333	541170	3.40027e+06	3400268.41789011j	10	100	160	-0.00294094429351112j	340026841.789011j	160+340026841.789011j	10.0000000864915-0.00294094429099289j	10	-0.00294094	10	-0.0168504
					5.86667	735642	4.62218e+06	4622176.60456134j	10	100	160	-0.00216348289031873j	462217660.456134j	160+462217660.456134j	10.0000000468066-0.0021634828893162j	10	-0.00216348	10	-0.0123958
					6	1e+06	6.28319e+06	6283185.30717967j	10	100	160	-0.00159154943091893j	628318530.717967j	160+628318530.717967j	10.0000000253303-0.00159154943051982j	10	-0.00159155	10	-0.00911891

## Sheet: Figure 6
	Impedance corresponding to the simplified Randle's circuit for RS = 50 Ω, Rct = 100 Ω, Qn = 0.0001 and n = 0.9
	Parameter	Value	Unit		power	f = 10^power	ω = 2πf	s = j*ω	ZRs(ω) = Rs	ZRct(ω) = Rct	ZCPE(ω) =1/[Qn(s^n)]	Z(ω) = ZRs+ZRctZCdl/(ZRct+ZCdl)	Z' / Ω	Z" / Ω	|Z|/ Ω	q/0
	Rs	15	Ω		-2	0.01	0.0628319	0.0628318530717959j	15	100	188786.336935938-1191950.02077923j	114.998703080425-0.00818409282441284j	114.999	-0.00818409	114.999	-0.00407756
	Rct	100	Ω		-1.86667	0.0135936	0.0854109	0.0854108810238862j	15	100	143209.081671507-904186.556318699j	114.998290053083-0.0107886464462415j	114.998	-0.0107886	114.998	-0.00537524
	Qn	1e-05	N/A		-1.73333	0.0184785	0.116104	0.116103826970385j	15	100	108635.197896528-685895.645266227j	114.997745374901-0.0142220510670631j	114.998	-0.0142221	114.998	-0.00708591
	n	0.9	N/A		-1.6	0.0251189	0.157826	0.157826479197647j	15	100	82408.2249831632-520305.05530913j	114.997026998017-0.0187480455628131j	114.997	-0.018748	114.997	-0.00934097
					-1.46667	0.0341455	0.214542	0.214542433147179j	15	100	62513.0314701875-394691.747131825j	114.996079382574-0.0247142696258177j	114.996	-0.0247143	114.996	-0.0123137
					-1.33333	0.0464159	0.29164	0.291639627613246j	15	100	47420.9838203779-299404.308423292j	114.994829121688-0.0325789392502653j	114.995	-0.0325789	114.995	-0.0162323
	Cdl	4.64159e-06	F		-1.2	0.0630957	0.396442	0.3964421916295j	15	100	35972.4949119605-227121.394237031j	114.993179114229-0.0429459922324301j	114.993	-0.042946	114.993	-0.021398
					-1.06667	0.0857696	0.538906	0.538906226805449j	15	100	27287.9279580646-172289.196477574j	114.991000779164-0.0566113847383588j	114.991	-0.0566114	114.991	-0.0282074
					-0.933333	0.116591	0.732566	0.73256562349222j	15	100	20700.0102179997-130694.720867685j	114.988123611654-0.074624062366934j	114.988	-0.0746241	114.988	-0.0371833
					-0.8	0.158489	0.995818	0.995817762032061j	15	100	15702.5635542495-99142.0844249242j	114.984321102058-0.0983662314080348j	114.984	-0.0983662	114.984	-0.0490151
					-0.666667	0.215443	1.35367	1.35367123896863j	15	100	11911.6125827244-75206.961986398j	114.979291629789-0.129658994622953j	114.979	-0.129659	114.979	-0.0646109
					-0.533333	0.292864	1.84012	1.84012164984046j	15	100	9035.88218769011-57050.3148489536j	114.972632332955-0.170901286766512j	114.973	-0.170901	114.973	-0.0851674
					-0.4	0.398107	2.50138	2.50138112470457j	15	100	6854.41759818735-43277.0894927706j	114.963803025324-0.225252465832765j	114.964	-0.225252	114.964	-0.112261
					-0.266667	0.54117	3.40027	3.40026841789007j	15	100	5199.60747987032-32829.0296017469j	114.952075793094-0.296872025547054j	114.952	-0.296872	114.952	-0.14797
					-0.133333	0.735642	4.62218	4.62217660456128j	15	100	3944.30563318364-24903.3656658545j	114.936463638305-0.39123384626865j	114.936	-0.391234	114.937	-0.195029
					-3.88578e-16	1	6.28319	6.28318530717958j	15	100	2992.06180239438-18891.1347368689j	114.915617915829-0.515537341529891j	114.916	-0.515537	114.917	-0.25704
					0.133333	1.35936	8.54109	8.54108810238862j	15	100	2269.71098639777-14330.3911782436j	114.887678455685-0.679243872784509j	114.888	-0.679244	114.89	-0.338743
	Frequency (f)	Value	Unit		0.266667	1.84785	11.6104	11.6103826970385j	15	100	1721.75185607873-10870.7133892116j	114.850050702043-0.894773805533568j	114.85	-0.894774	114.854	-0.446371
	Low	0.01	Hz		0.4	2.51189	15.7826	15.7826479197647j	15	100	1306.08234778621-8246.27940162547j	114.799068493073-1.17840704658637j	114.799	-1.17841	114.805	-0.588118
	High	1000000	Hz		0.533333	3.41455	21.4542	21.4542433147179j	15	100	990.764780172075-6255.44263149813j	114.729475237065-1.55143635520838j	114.729	-1.55144	114.74	-0.774738
					0.666667	4.64159	29.164	29.1639627613246j	15	100	751.571944367255-4745.23850213602j	114.633613728305-2.0416246150456j	114.634	-2.04162	114.652	-1.02033
					0.8	6.30957	39.6442	39.64421916295j	15	100	570.125623018081-3599.63151588546j	114.500145562416-2.68500669886426j	114.5	-2.68501	114.532	-1.34333
					0.933333	8.57696	53.8906	53.8906226805449j	15	100	432.484512571059-2730.59974631902j	114.31201015658-3.52803668005868j	114.312	-3.52804	114.366	-1.76777
					1.06667	11.6591	73.2566	73.256562349222j	15	100	328.073052783832-2071.37173393799j	114.043161448494-4.62997686175949j	114.043	-4.62998	114.137	-2.32484
					1.2	15.8489	99.5818	99.5817762032061j	15	100	248.868860813181-1571.29614691467j	113.653370089634-6.06518559594681j	113.653	-6.06519	113.815	-3.05473
					1.33333	21.5443	135.367	135.367123896863j	15	100	188.786336935939-1191.95002077923j	113.080059861007-7.92444931034016j	113.08	-7.92445	113.357	-4.00863
					1.46667	29.2864	184.012	184.012164984046j	15	100	143.209081671507-904.186556318699j	112.225870013761-10.3134760503146j	112.226	-10.3135	112.699	-5.25069
					1.6	39.8107	250.138	250.138112470457j	15	100	108.635197896527-685.895645266222j	110.940803215592-13.3447540289186j	110.941	-13.3448	111.741	-6.85899
					1.73333	54.117	340.027	340.026841789007j	15	100	82.4082249831634-520.30505530913j	108.999534250964-17.1158546371514j	109	-17.1159	110.335	-8.9241
					1.86667	73.5642	462.218	462.217660456128j	15	100	62.5130314701873-394.691747131825j	106.080125506624-21.6634987123053j	106.08	-21.6635	108.27	-11.5421
					2	100	628.319	628.318530717958j	15	100	47.4209838203779-299.404308423292j	101.763653370473-26.8823277796944j	101.764	-26.8823	105.254	-14.7975
					2.13333	135.936	854.109	854.108810238862j	15	100	35.9724949119605-227.121394237031j	95.5954961667181-32.4122754969406j	95.5955	-32.4123	100.941	-18.7296
					2.26667	184.785	1161.04	1161.03826970385j	15	100	27.2879279580646-172.289196477574j	87.2598335818614-37.5474018550277j	87.2598	-37.5474	94.9952	-23.2819
					2.4	251.189	1578.26	1578.26479197647j	15	100	20.7000102179998-130.694720867685j	76.8636568638634-41.2942692555657j	76.8637	-41.2943	87.2539	-28.2465
					2.53333	341.455	2145.42	2145.42433147179j	15	100	15.7025635542495-99.1420844249241j	65.1630828656119-42.7037715866928j	65.1631	-42.7038	77.9092	-33.2383
					2.66667	464.159	2916.4	2916.39627613246j	15	100	11.9116125827242-75.2069619863975j	53.4434601147533-41.3672919934188j	53.4435	-41.3673	67.583	-37.7412
					2.8	630.957	3964.42	3964.421916295j	15	100	9.03588218769001-57.0503148489533j	42.9985237421449-37.6729825786086j	42.9985	-37.673	57.1675	-41.2231
					2.93333	857.696	5389.06	5389.06226805449j	15	100	6.85441759818735-43.2770894927706j	34.6025563636645-32.5617549694895j	34.6026	-32.5618	47.5143	-43.2596
					3.06667	1165.91	7325.66	7325.6562349222j	15	100	5.19960747987032-32.8290296017469j	28.3781938038015-27.0315632148716j	28.3782	-27.0316	39.1922	-43.6078
					3.2	1584.89	9958.18	9958.1776203206j	15	100	3.94430563318362-24.9033656658544j	24.017086513418-21.7980268384977j	24.0171	-21.798	32.4342	-42.227
					3.33333	2154.43	13536.7	13536.7123896863j	15	100	2.99206180239439-18.8911347368689j	21.0654783177976-17.2297716395515j	21.0655	-17.2298	27.2143	-39.2802
					3.46667	2928.64	18401.2	18401.2164984046j	15	100	2.26971098639779-14.3303911782436j	19.1022522312562-13.4375293073959j	19.1023	-13.4375	23.3552	-35.1246
					3.6	3981.07	25013.8	25013.8112470457j	15	100	1.72175185607873-10.8707133892116j	17.8026600076928-10.3872024023442j	17.8027	-10.3872	20.6114	-30.262
					3.73333	5411.7	34002.7	34002.6841789007j	15	100	1.30608234778619-8.2462794016254j	16.938986489651-7.98213194185939j	16.939	-7.98213	18.7255	-25.2311
					3.86667	7356.42	46221.8	46221.7660456128j	15	100	0.990764780172075-6.25544263149813j	16.3594945390575-6.10986583175227j	16.3595	-6.10987	17.4632	-20.4794
					4	10000	62831.9	62831.8530717958j	15	100	0.751571944367253-4.74523850213602j	15.9656494062957-4.66436011272137j	15.9656	-4.66436	16.633	-16.2857
					4.13333	13593.6	85410.9	85410.8810238862j	15	100	0.57012562301808-3.59963151588546j	15.6941129463552-3.55438156745672j	15.6941	-3.55438	16.0916	-12.761
					4.26667	18478.5	116104	116103.826970385j	15	100	0.432484512571059-2.73059974631902j	15.5041704244105-2.70513358618445j	15.5042	-2.70513	15.7384	-9.89721
					4.4	25118.9	157826	157826.479197648j	15	100	0.328073052783831-2.07137173393798j	15.3694684278877-2.05697030408542j	15.3695	-2.05697	15.5065	-7.62287
					4.53333	34145.5	214542	214542.43314718j	15	100	0.248868860813179-1.57129614691466j	15.272751316706-1.56312029631004j	15.2728	-1.56312	15.3525	-5.8437
					4.66667	46415.9	291640	291639.627613248j	15	100	0.188786336935938-1.19195002077923j	15.2025558926275-1.1872942065338j	15.2026	-1.18729	15.2488	-4.46564
					4.8	63095.7	396442	396442.191629501j	15	100	0.143209081671506-0.904186556318691j	15.1511441323028-0.901528860192055j	15.1511	-0.901529	15.1779	-3.40522
					4.93333	85769.6	538906	538906.226805452j	15	100	0.108635197896528-0.685895645266222j	15.1132063190781-0.6843756951627j	15.1132	-0.684376	15.1287	-2.59277
					5.06667	116591	732566	732565.623492225j	15	100	0.0824082249831631-0.520305055309127j	15.0850407884819-0.51943452701392j	15.085	-0.519435	15.094	-1.97213
					5.2	158489	995818	995817.762032069j	15	100	0.0625130314701868-0.394691747131821j	15.0640288507893-0.394192608792386j	15.064	-0.394193	15.0692	-1.49896
					5.33333	215443	1.35367e+06	1353671.23896864j	15	100	0.0474209838203775-0.29940430842329j	15.0482936542859-0.299117870504688j	15.0483	-0.299118	15.0513	-1.13873
					5.46667	292864	1.84012e+06	1840121.64984048j	15	100	0.0359724949119602-0.227121394237028j	15.0364748416997-0.22695691000511j	15.0365	-0.226957	15.0382	-0.864743
					5.6	398107	2.50138e+06	2501381.1247046j	15	100	0.0272879279580643-0.172289196477572j	15.0275770756033-0.172194695791068j	15.0276	-0.172195	15.0286	-0.6565
					5.73333	541170	3.40027e+06	3400268.41789011j	15	100	0.0207000102179994-0.130694720867683j	15.0208664309799-0.130640406966368j	15.0209	-0.13064	15.0214	-0.498304
					5.86667	735642	4.62218e+06	4622176.60456134j	15	100	0.0157025635542494-0.099142084424923j	15.0157983433805-0.099110858672419j	15.0158	-0.0991109	15.0161	-0.378172
					6	1e+06	6.28319e+06	6283185.30717967j	15	100	0.0119116125827242-0.0752069619863969j	15.0119667345188-0.0751890059458231j	15.012	-0.075189	15.0122	-0.28697

## Sheet: Figure 7a,b&c
	Impedance of Warburg diffusion with coefficient σ = 150 Ω/s0.5.
	Parameter	Value	Unit		power	f = 10^power	ω = 2πf	s = j*ω	Z(ω) = ZW	Z' / Ω	Z" / Ω	|Z|/ Ω	ϴ/degrees
	σ	10	Ω/s^0.5		-2	0.01	0.0628319	0.0628318530717959j	39.8942280401432-39.8942280401432j	39.8942	-39.8942	56.419	-45
					-1.86667	0.0135936	0.0854109	0.0854108810238862j	34.2171157674807-34.2171157674807j	34.2171	-34.2171	48.3903	-45
					-1.73333	0.0184785	0.116104	0.116103826970385j	29.347879855378-29.347879855378j	29.3479	-29.3479	41.5042	-45
					-1.6	0.0251189	0.157826	0.157826479197647j	25.1715561842961-25.1715561842961j	25.1716	-25.1716	35.598	-45
					-1.46667	0.0341455	0.214542	0.214542433147179j	21.589540500421-21.589540500421j	21.5895	-21.5895	30.5322	-45
					-1.33333	0.0464159	0.29164	0.291639627613246j	18.5172603396731-18.5172603396731j	18.5173	-18.5173	26.1874	-45
					-1.2	0.0630957	0.396442	0.3964421916295j	15.8821782464774-15.8821782464774j	15.8822	-15.8822	22.4608	-45
					-1.06667	0.0857696	0.538906	0.538906226805449j	13.6220791426932-13.6220791426932j	13.6221	-13.6221	19.2645	-45
					-0.933333	0.116591	0.732566	0.73256562349222j	11.6836014109685-11.6836014109685j	11.6836	-11.6836	16.5231	-45
					-0.8	0.158489	0.995818	0.995817762032061j	10.0209770109585-10.0209770109585j	10.021	-10.021	14.1718	-45
					-0.666667	0.215443	1.35367	1.35367123896863j	8.59495088217275-8.59495088217275j	8.59495	-8.59495	12.1551	-45
					-0.533333	0.292864	1.84012	1.84012164984046j	7.37185412022975-7.37185412022975j	7.37185	-7.37185	10.4254	-45
					-0.4	0.398107	2.50138	2.50138112470457j	6.32280904393142-6.32280904393142j	6.32281	-6.32281	8.9418	-45
					-0.266667	0.54117	3.40027	3.40026841789007j	5.42304738455339-5.42304738455339j	5.42305	-5.42305	7.66935	-45
					-0.133333	0.735642	4.62218	4.62217660456128j	4.65132549959552-4.65132549959552j	4.65133	-4.65133	6.57797	-45
					-3.88578e-16	1	6.28319	6.28318530717958j	3.98942280401434-3.98942280401432j	3.98942	-3.98942	5.6419	-45
					0.133333	1.35936	8.54109	8.54108810238862j	3.42171157674808-3.42171157674808j	3.42171	-3.42171	4.83903	-45
	Frequency (f)	Value	Unit		0.266667	1.84785	11.6104	11.6103826970385j	2.9347879855378-2.9347879855378j	2.93479	-2.93479	4.15042	-45
	Low	0.01	Hz		0.4	2.51189	15.7826	15.7826479197647j	2.51715561842961-2.51715561842961j	2.51716	-2.51716	3.5598	-45
	High	1000000	Hz		0.533333	3.41455	21.4542	21.4542433147179j	2.1589540500421-2.1589540500421j	2.15895	-2.15895	3.05322	-45
					0.666667	4.64159	29.164	29.1639627613246j	1.85172603396731-1.85172603396731j	1.85173	-1.85173	2.61874	-45
					0.8	6.30957	39.6442	39.64421916295j	1.58821782464774-1.58821782464774j	1.58822	-1.58822	2.24608	-45
					0.933333	8.57696	53.8906	53.8906226805449j	1.36220791426932-1.36220791426932j	1.36221	-1.36221	1.92645	-45
					1.06667	11.6591	73.2566	73.256562349222j	1.16836014109685-1.16836014109685j	1.16836	-1.16836	1.65231	-45
					1.2	15.8489	99.5818	99.5817762032061j	1.00209770109585-1.00209770109585j	1.0021	-1.0021	1.41718	-45
					1.33333	21.5443	135.367	135.367123896863j	0.859495088217275-0.859495088217275j	0.859495	-0.859495	1.21551	-45
					1.46667	29.2864	184.012	184.012164984046j	0.737185412022975-0.737185412022975j	0.737185	-0.737185	1.04254	-45
					1.6	39.8107	250.138	250.138112470457j	0.632280904393142-0.632280904393142j	0.632281	-0.632281	0.89418	-45
					1.73333	54.117	340.027	340.026841789007j	0.542304738455339-0.542304738455339j	0.542305	-0.542305	0.766935	-45
					1.86667	73.5642	462.218	462.217660456128j	0.465132549959552-0.465132549959552j	0.465133	-0.465133	0.657797	-45
					2	100	628.319	628.318530717958j	0.398942280401434-0.398942280401432j	0.398942	-0.398942	0.56419	-45
					2.13333	135.936	854.109	854.108810238862j	0.342171157674808-0.342171157674808j	0.342171	-0.342171	0.483903	-45
					2.26667	184.785	1161.04	1161.03826970385j	0.293478798553781-0.29347879855378j	0.293479	-0.293479	0.415042	-45
					2.4	251.189	1578.26	1578.26479197647j	0.251715561842961-0.251715561842961j	0.251716	-0.251716	0.35598	-45
					2.53333	341.455	2145.42	2145.42433147179j	0.21589540500421-0.21589540500421j	0.215895	-0.215895	0.305322	-45
					2.66667	464.159	2916.4	2916.39627613246j	0.185172603396731-0.185172603396731j	0.185173	-0.185173	0.261874	-45
					2.8	630.957	3964.42	3964.421916295j	0.158821782464774-0.158821782464774j	0.158822	-0.158822	0.224608	-45
					2.93333	857.696	5389.06	5389.06226805449j	0.136220791426932-0.136220791426932j	0.136221	-0.136221	0.192645	-45
					3.06667	1165.91	7325.66	7325.6562349222j	0.116836014109685-0.116836014109685j	0.116836	-0.116836	0.165231	-45
					3.2	1584.89	9958.18	9958.1776203206j	0.100209770109585-0.100209770109585j	0.10021	-0.10021	0.141718	-45
					3.33333	2154.43	13536.7	13536.7123896863j	0.0859495088217275-0.0859495088217275j	0.0859495	-0.0859495	0.121551	-45
					3.46667	2928.64	18401.2	18401.2164984046j	0.0737185412022975-0.0737185412022975j	0.0737185	-0.0737185	0.104254	-45
					3.6	3981.07	25013.8	25013.8112470457j	0.0632280904393142-0.0632280904393142j	0.0632281	-0.0632281	0.089418	-45
					3.73333	5411.7	34002.7	34002.6841789007j	0.0542304738455339-0.0542304738455339j	0.0542305	-0.0542305	0.0766935	-45
					3.86667	7356.42	46221.8	46221.7660456128j	0.0465132549959552-0.0465132549959552j	0.0465133	-0.0465133	0.0657797	-45
					4	10000	62831.9	62831.8530717958j	0.0398942280401434-0.0398942280401432j	0.0398942	-0.0398942	0.056419	-45
					4.13333	13593.6	85410.9	85410.8810238862j	0.0342171157674808-0.0342171157674808j	0.0342171	-0.0342171	0.0483903	-45
					4.26667	18478.5	116104	116103.826970385j	0.0293478798553781-0.029347879855378j	0.0293479	-0.0293479	0.0415042	-45
					4.4	25118.9	157826	157826.479197648j	0.025171556184296-0.025171556184296j	0.0251716	-0.0251716	0.035598	-45
					4.53333	34145.5	214542	214542.43314718j	0.0215895405004209-0.0215895405004209j	0.0215895	-0.0215895	0.0305322	-45
					4.66667	46415.9	291640	291639.627613248j	0.0185172603396731-0.0185172603396731j	0.0185173	-0.0185173	0.0261874	-45
					4.8	63095.7	396442	396442.191629501j	0.0158821782464774-0.0158821782464774j	0.0158822	-0.0158822	0.0224608	-45
					4.93333	85769.6	538906	538906.226805452j	0.0136220791426932-0.0136220791426932j	0.0136221	-0.0136221	0.0192645	-45
					5.06667	116591	732566	732565.623492225j	0.0116836014109685-0.0116836014109685j	0.0116836	-0.0116836	0.0165231	-45
					5.2	158489	995818	995817.762032069j	0.0100209770109585-0.0100209770109585j	0.010021	-0.010021	0.0141718	-45
					5.33333	215443	1.35367e+06	1353671.23896864j	0.00859495088217272-0.00859495088217272j	0.00859495	-0.00859495	0.0121551	-45
					5.46667	292864	1.84012e+06	1840121.64984048j	0.00737185412022971-0.00737185412022971j	0.00737185	-0.00737185	0.0104254	-45
					5.6	398107	2.50138e+06	2501381.1247046j	0.00632280904393142-0.00632280904393142j	0.00632281	-0.00632281	0.0089418	-45
					5.73333	541170	3.40027e+06	3400268.41789011j	0.00542304738455339-0.00542304738455339j	0.00542305	-0.00542305	0.00766935	-45
					5.86667	735642	4.62218e+06	4622176.60456134j	0.00465132549959549-0.00465132549959549j	0.00465133	-0.00465133	0.00657797	-45
					6	1e+06	6.28319e+06	6283185.30717967j	0.0039894228040143-0.0039894228040143j	0.00398942	-0.00398942	0.0056419	-45

## Sheet: Figure 7d&e
	Impedance of the Randle’s circuit for RS = 50 Ω, Rct = 100 Ω, Cdl = 100 μF and the Warburg coefficient σ = 50 Ω/s^0.5 .
	Parameter	Value	Unit		power	f = 10^power	ω = 2πf	s = j*ω	ZRs(ω) = Rs	ZRct(ω) = Rct	ZCdl(ω) = 1/(s*Cdl)	Z(ω) = ZW	Z(ω) = ZRs+1/(1/(ZRct+ZW)+1/ZCdl)	Z' / Ω	Z" / Ω	|Z|/ Ω	ϴ/degrees
	Rs	50	Ω		-2	0.01	0.0628319	0.0628318530717959j	50	100	-159154.943091895j	199.471140200716-199.471140200716j	348.720831255785-199.782832427155j	348.721	-199.783	401.895	-29.8085
	Rct	100	Ω		-1.86667	0.0135936	0.0854109	0.0854108810238862j	50	100	-117081.101144518j	171.085578837404-171.085578837404j	320.293615787593-171.460859053794j	320.294	-171.461	363.3	-28.1612
	Cdl	0.0001	N/A		-1.73333	0.0184785	0.116104	0.116103826970385j	50	100	-86129.8052005705j	146.73939927689-146.73939927689j	295.898791678295-147.193062193306j	295.899	-147.193	330.487	-26.4478
	σ	50	Ω/s^0.5		-1.6	0.0251189	0.157826	0.157826479197647j	50	100	-63360.7240739175j	125.857780921481-125.857780921481j	274.960326363013-126.408588006499j	274.96	-126.409	302.626	-24.6898
					-1.46667	0.0341455	0.214542	0.214542433147179j	50	100	-46610.8259019318j	107.947702502105-107.947702502105j	256.983750230855-108.619575636149j	256.984	-108.62	278.996	-22.9124
					-1.33333	0.0464159	0.29164	0.291639627613246j	50	100	-34288.893048723j	92.5863016983655-92.5863016983655j	241.544452372045-93.4099025138619j	241.544	-93.4099	258.977	-21.1424
					-1.2	0.0630957	0.396442	0.3964421916295j	50	100	-25224.3585852881j	79.4108912323871-79.4108912323871j	228.277604434377-80.4257145090475j	228.278	-80.4257	242.031	-19.4081
					-1.06667	0.0857696	0.538906	0.538906226805449j	50	100	-18556.1040169798j	68.1103957134662-68.1103957134662j	216.869458999219-69.3675475192704j	216.869	-69.3675	227.693	-17.7373
					-0.933333	0.116591	0.732566	0.73256562349222j	50	100	-13650.6541930386j	58.4180070548426-58.4180070548426j	207.049789508633-59.9838935569163j	207.05	-59.9839	215.564	-16.1567
					-0.8	0.158489	0.995818	0.995817762032061j	50	100	-10041.9980254159j	50.1048850547925-50.1048850547925j	198.585244854877-52.0661087728832j	198.585	-52.0661	205.297	-14.6914
					-0.666667	0.215443	1.35367	1.35367123896863j	50	100	-7387.31806669621j	42.9747544108637-42.9747544108637j	191.273376526094-45.4446028056412j	191.273	-45.4446	196.598	-13.3651
					-0.533333	0.292864	1.84012	1.84012164984046j	50	100	-5434.42331699483j	36.8592706011488-36.8592706011488j	184.937047331652-39.9862851122292j	184.937	-39.9863	189.211	-12.2004
					-0.4	0.398107	2.50138	2.50138112470457j	50	100	-3997.79142060212j	31.6140452196571-31.6140452196571j	179.418826604897-35.5932643818646j	179.419	-35.5933	182.915	-11.2207
					-0.266667	0.54117	3.40027	3.40026841789007j	50	100	-2940.94429351115j	27.1152369227669-27.1152369227669j	174.574781416142-32.2027753046973j	174.575	-32.2028	177.52	-10.4515
					-0.133333	0.735642	4.62218	4.62217660456128j	50	100	-2163.48289031876j	23.2566274979776-23.2566274979776j	170.266731418708-29.7881786388082j	170.267	-29.7882	172.853	-9.92347
					-3.88578e-16	1	6.28319	6.28318530717958j	50	100	-1591.54943091896j	19.9471140200717-19.9471140200716j	166.351475881929-28.360496244727j	166.351	-28.3605	168.752	-9.67507
					0.133333	1.35936	8.54109	8.54108810238862j	50	100	-1170.81101144518j	17.1085578837404-17.1085578837404j	162.664684402983-27.9689698973979j	162.665	-27.969	165.052	-9.75618
	Frequency (f)	Value	Unit		0.266667	1.84785	11.6104	11.6103826970385j	50	100	-861.298052005705j	14.673939927689-14.673939927689j	158.99624357256-28.6968816289073j	158.996	-28.6969	161.565	-10.231
	Low	0.01	Hz		0.4	2.51189	15.7826	15.7826479197647j	50	100	-633.607240739175j	12.5857780921481-12.5857780921481j	155.053863261271-30.64411172716j	155.054	-30.6441	158.053	-11.1796
	High	1000000	Hz		0.533333	3.41455	21.4542	21.4542433147179j	50	100	-466.108259019318j	10.7947702502105-10.7947702502105j	150.416046321839-33.8792235693064j	150.416	-33.8792	154.184	-12.6933
					0.666667	4.64159	29.164	29.1639627613246j	50	100	-342.88893048723j	9.25863016983655-9.25863016983655j	144.49271234181-38.3328684231785j	144.493	-38.3329	149.491	-14.8579
					0.8	6.30957	39.6442	39.64421916295j	50	100	-252.243585852881j	7.94108912323872-7.94108912323872j	136.555499289575-43.6074248415551j	136.555	-43.6074	143.349	-17.7103
					0.933333	8.57696	53.8906	53.8906226805449j	50	100	-185.561040169798j	6.81103957134662-6.8110395713466j	125.963380548207-48.7471531514501j	125.963	-48.7472	135.067	-21.1562
					1.06667	11.6591	73.2566	73.256562349222j	50	100	-136.506541930386j	5.84180070548426-5.84180070548426j	112.680001194911-52.2071986932335j	112.68	-52.2072	124.187	-24.8594
					1.2	15.8489	99.5818	99.5817762032061j	50	100	-100.419980254159j	5.01048850547925-5.01048850547925j	97.8234244099817-52.4052902456231j	97.8234	-52.4053	110.976	-28.1785
					1.33333	21.5443	135.367	135.367123896863j	50	100	-73.8731806669621j	4.29747544108637-4.29747544108637j	83.5034416329519-48.7624480893081j	83.5034	-48.7624	96.6985	-30.2831
					1.46667	29.2864	184.012	184.012164984046j	50	100	-54.3442331699483j	3.68592706011488-3.68592706011488j	71.6892848327953-42.2053372772312j	71.6893	-42.2053	83.1904	-30.4864
					1.6	39.8107	250.138	250.138112470457j	50	100	-39.9779142060212j	3.16140452196571-3.16140452196571j	63.186625869332-34.4636227036919j	63.1866	-34.4636	71.9742	-28.6092
					1.73333	54.117	340.027	340.026841789007j	50	100	-29.4094429351115j	2.71152369227669-2.71152369227669j	57.6706328684505-27.0106065288226j	57.6706	-27.0106	63.6826	-25.0965
					1.86667	73.5642	462.218	462.217660456128j	50	100	-21.6348289031876j	2.32566274979776-2.32566274979776j	54.3365032797529-20.6193969201891j	54.3365	-20.6194	58.1173	-20.7805
					2	100	628.319	628.318530717958j	50	100	-15.9154943091896j	1.99471140200717-1.99471140200716j	52.409203012778-15.4924398099341j	52.4092	-15.4924	54.6511	-16.468
					2.13333	135.936	854.109	854.108810238862j	50	100	-11.7081101144518j	1.71085578837404-1.71085578837404j	51.3246828587968-11.5333414137416j	51.3247	-11.5333	52.6046	-12.6648
					2.26667	184.785	1161.04	1161.03826970385j	50	100	-8.61298052005705j	1.46739399276891-1.4673939927689j	50.7239609097276-8.54105793669772j	50.724	-8.54106	51.438	-9.55798
					2.4	251.189	1578.26	1578.26479197647j	50	100	-6.33607240739175j	1.25857780921481-1.25857780921481j	50.3942504649099-6.30650262235717j	50.3943	-6.3065	50.7873	-7.1331
					2.53333	341.455	2145.42	2145.42433147179j	50	100	-4.66108259019318j	1.07947702502105-1.07947702502105j	50.2142456903382-4.6489150345836j	50.2142	-4.64892	50.429	-5.28946
					2.66667	464.159	2916.4	2916.39627613246j	50	100	-3.4288893048723j	0.925863016983655-0.925863016983655j	50.116277761124-3.42387214836655j	50.1163	-3.42387	50.2331	-3.90829
					2.8	630.957	3964.42	3964.421916295j	50	100	-2.52243585852881j	0.794108912323871-0.794108912323871j	50.0630572700046-2.52036101247525j	50.0631	-2.52036	50.1265	-2.88205
					2.93333	857.696	5389.06	5389.06226805449j	50	100	-1.85561040169798j	0.681103957134662-0.68110395713466j	50.0341782654557-1.85474926198721j	50.0342	-1.85475	50.0685	-2.12296
					3.06667	1165.91	7325.66	7325.6562349222j	50	100	-1.36506541930386j	0.584180070548426-0.584180070548426j	50.0185188570368-1.36470653783233j	50.0185	-1.36471	50.0371	-1.56287
					3.2	1584.89	9958.18	9958.1776203206j	50	100	-1.00419980254159j	0.501048850547925-0.501048850547925j	50.0100316473681-1.00404955412268j	50.01	-1.00405	50.0201	-1.15017
					3.33333	2154.43	13536.7	13536.7123896863j	50	100	-0.738731806669621j	0.429747544108637-0.429747544108637j	50.0054331593143-0.738668592984199j	50.0054	-0.738669	50.0109	-0.846298
					3.46667	2928.64	18401.2	18401.2164984046j	50	100	-0.543442331699483j	0.368592706011488-0.368592706011488j	50.0029422070818-0.543415596284805j	50.0029	-0.543416	50.0059	-0.622647
					3.6	3981.07	25013.8	25013.8112470457j	50	100	-0.399779142060212j	0.316140452196571-0.316140452196571j	50.0015931157446-0.399767772575975j	50.0016	-0.399768	50.0032	-0.458076
					3.73333	5411.7	34002.7	34002.6841789007j	50	100	-0.294094429351115j	0.271152369227669-0.271152369227669j	50.0008625490274-0.29408956700472j	50.0009	-0.29409	50.0017	-0.336992
					3.86667	7356.42	46221.8	46221.7660456128j	50	100	-0.216348289031876j	0.232566274979776-0.232566274979776j	50.0004669704172-0.216346197597634j	50.0005	-0.216346	50.0009	-0.247911
					4	10000	62831.9	62831.8530717958j	50	100	-0.159154943091896j	0.199471140200717-0.199471140200716j	50.0002527954603-0.159154038306224j	50.0003	-0.159154	50.0005	-0.182376
					4.13333	13593.6	85410.9	85410.8810238862j	50	100	-0.117081101144518j	0.171085578837404-0.171085578837404j	50.0001368445867-0.117080707477523j	50.0001	-0.117081	50.0003	-0.134164
					4.26667	18478.5	116104	116103.826970385j	50	100	-0.0861298052005705j	0.146739399276891-0.14673939927689j	50.0000740743361-0.0861296329570026j	50.0001	-0.0861296	50.0001	-0.098697
					4.4	25118.9	157826	157826.479197648j	50	100	-0.0633607240739171j	0.12585778092148-0.12585778092148j	50.0000400952072-0.0633606483017306j	50	-0.0633606	50.0001	-0.0726059
					4.53333	34145.5	214542	214542.43314718j	50	100	-0.0466108259019316j	0.107947702502105-0.107947702502105j	50.0000217022121-0.0466107923954814j	50	-0.0466108	50	-0.053412
					4.66667	46415.9	291640	291639.627613248j	50	100	-0.0342888930487228j	0.0925863016983653-0.0925863016983653j	50.0000117463874-0.0342888781592565j	50	-0.0342889	50	-0.0392921
					4.8	63095.7	396442	396442.191629501j	50	100	-0.025224358585288j	0.079410891232387-0.079410891232387j	50.0000063576271-0.0252243519382475j	50	-0.0252244	50	-0.028905
					4.93333	85769.6	538906	538906.226805452j	50	100	-0.0185561040169797j	0.0681103957134659-0.0681103957134659j	50.0000034409437-0.018556101036864j	50	-0.0185561	50	-0.0212637
					5.06667	116591	732566	732565.623492225j	50	100	-0.0136506541930385j	0.0584180070548425-0.0584180070548425j	50.0000018623147-0.0136506528516768j	50	-0.0136507	50	-0.0156425
					5.2	158489	995818	995817.762032069j	50	100	-0.0100419980254158j	0.0501048850547923-0.0501048850547923j	50.0000010079119-0.0100419974194918j	50	-0.010042	50	-0.0115073
					5.33333	215443	1.35367e+06	1353671.23896864j	50	100	-0.00738731806669615j	0.0429747544108636-0.0429747544108636j	50.0000005454901-0.00738731779209405j	50	-0.00738732	50	-0.00846524
					5.46667	292864	1.84012e+06	1840121.64984048j	50	100	-0.00543442331699477j	0.0368592706011486-0.0368592706011485j	50.0000002952207-0.00543442319218104j	50	-0.00543442	50	-0.00622739
					5.6	398107	2.50138e+06	2501381.1247046j	50	100	-0.00399779142060207j	0.0316140452196571-0.0316140452196571j	50.0000001597728-0.00399779136372201j	50	-0.00399779	50	-0.00458113
					5.73333	541170	3.40027e+06	3400268.41789011j	50	100	-0.00294094429351112j	0.027115236922767-0.027115236922767j	50.0000000864681-0.00294094426752916j	50	-0.00294094	50	-0.00337007
					5.86667	735642	4.62218e+06	4622176.60456134j	50	100	-0.00216348289031873j	0.0232566274979775-0.0232566274979775j	50.0000000467957-0.00216348287842598j	50	-0.00216348	50	-0.00247917
					6	1e+06	6.28319e+06	6283185.30717967j	50	100	-0.00159154943091893j	0.0199471140200715-0.0199471140200715j	50.0000000253252-0.0015915494254653j	50	-0.00159155	50	-0.00182378

[truncated: 4 more sheets: Figure 8a,b,c&d, Figure 8e&f, Figure 9&11, EIS_DSSCs_TimeConstants]
